# Supplementary material for: [Retracted] Bioinformatics Analyses Reveals a Comprehensive Landscape of CXC Chemokine Family Functions in Non‐Small Cell Lung Cancer
Source: Hindawi journal article supplement (doi:10.1155/2021/6686158), 2021-01-01
Supplement: f1 [file 6686158.f1.zip]

Archive with 4 entries (4 files):
- Supplementary Figure 1A CXCL8_EGFR_correlation in LUAD.pdf
- Supplementary Figure 1B CXCL12_EGFR_correlation in LUAD.pdf
- Supplementary Figure 1C CXCL8_EGFR_correlation in LUSC.pdf
- Supplementary Figure 1D CXCL12_EGFR_correlation in LUSC.pdf
