# Supplementary figures and images for: [Retracted] Bioinformatics Analyses Reveals a Comprehensive Landscape of CXC Chemokine Family Functions in Non‐Small Cell Lung Cancer
Source: Hindawi journal article supplement (doi:10.1155/2021/6686158), 2021-01-01

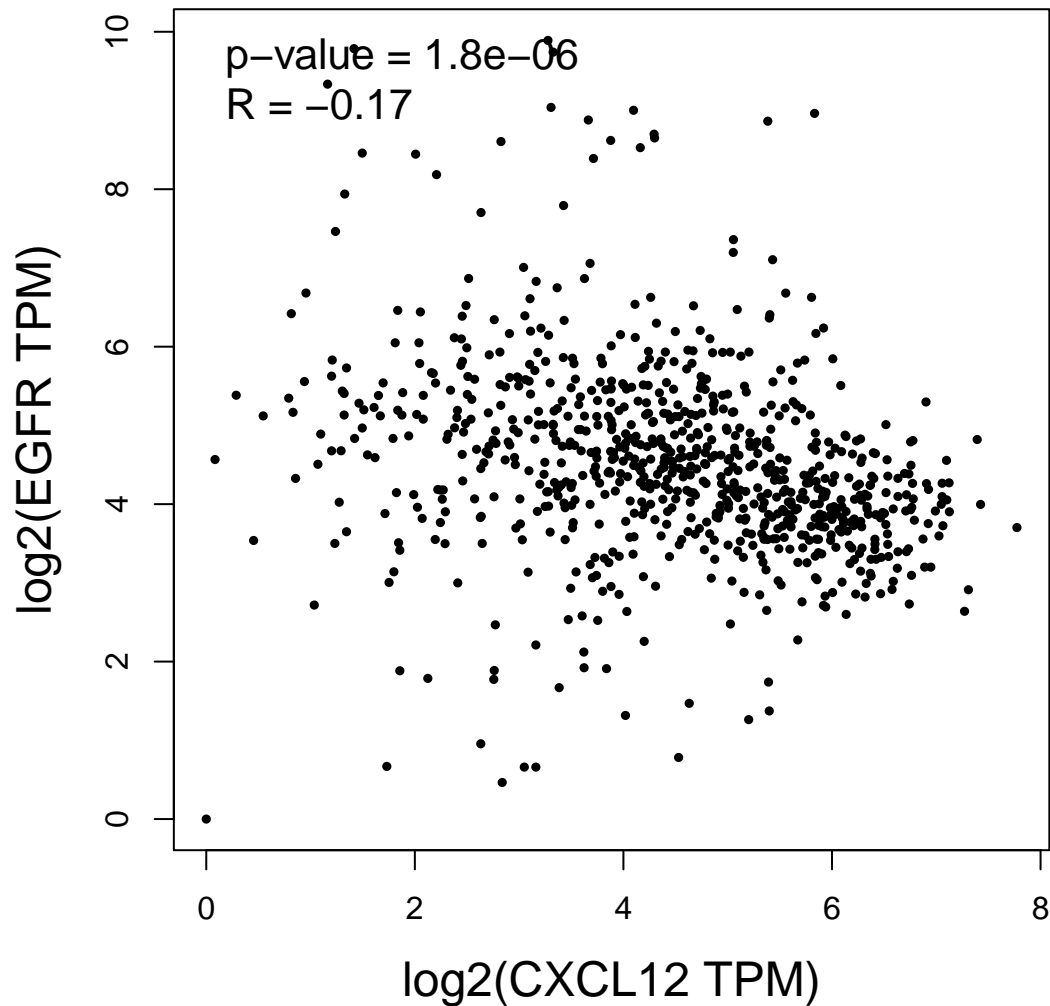

Supplement: f1 [file 6686158.f1.zip]

p-value = 0.15

R = -0.05

log<sub>2</sub>(EGFR TPM)

8

6

4

2

0

0

log<sub>2</sub>(CXCL12 TPM)

2

4

6

8

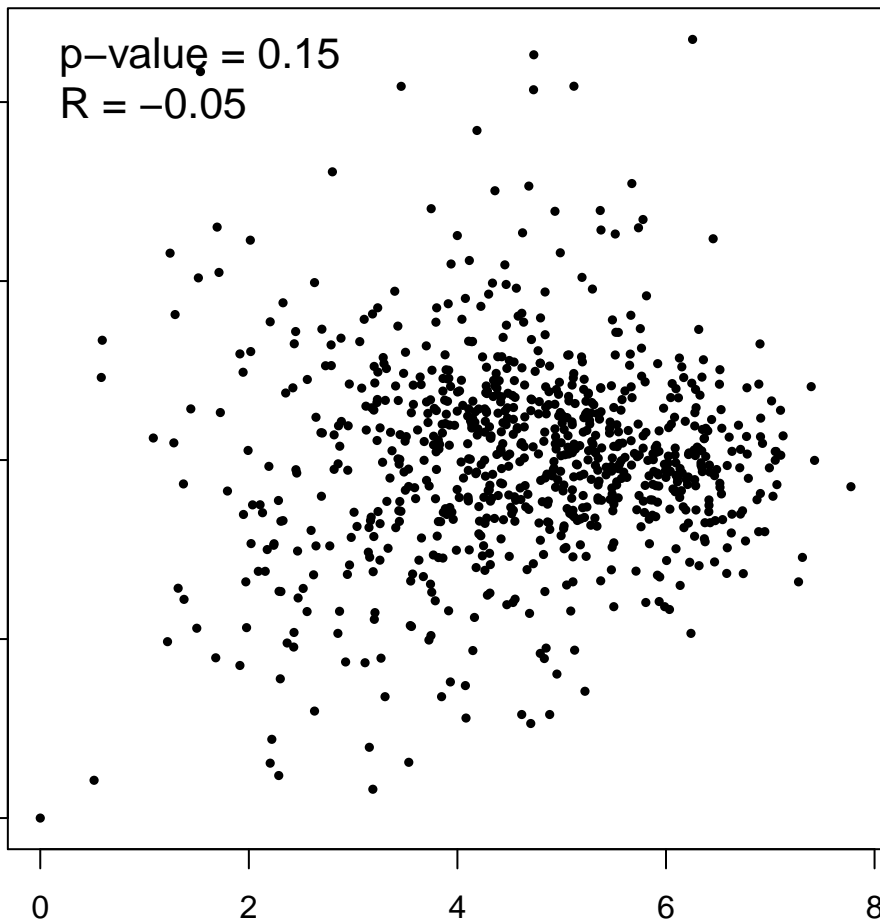

Supplement: f1 [file 6686158.f1.zip]

p-value = 0.19

R = -0.046

log2(EGFR TPM)

8

6

4

2

0

0

2

4

6

8

10

log2(CXCL8 TPM)

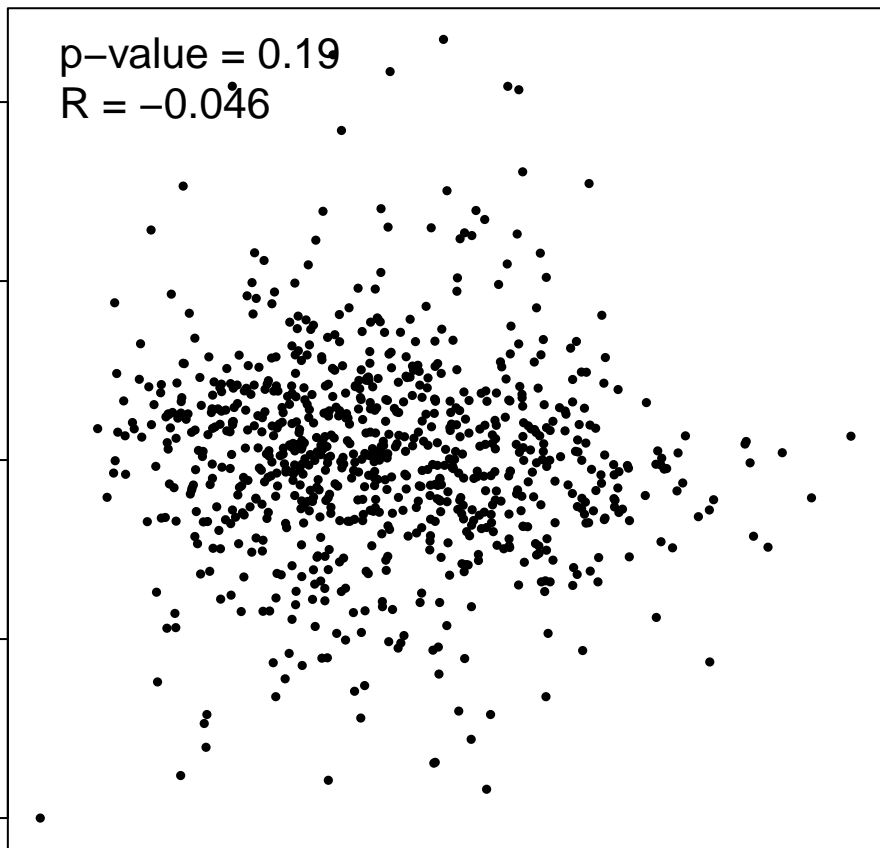

Supplement: f1 [file 6686158.f1.zip › Supplementary Figure 1A CXCL8_EGFR_correlation in LUAD.pdf]

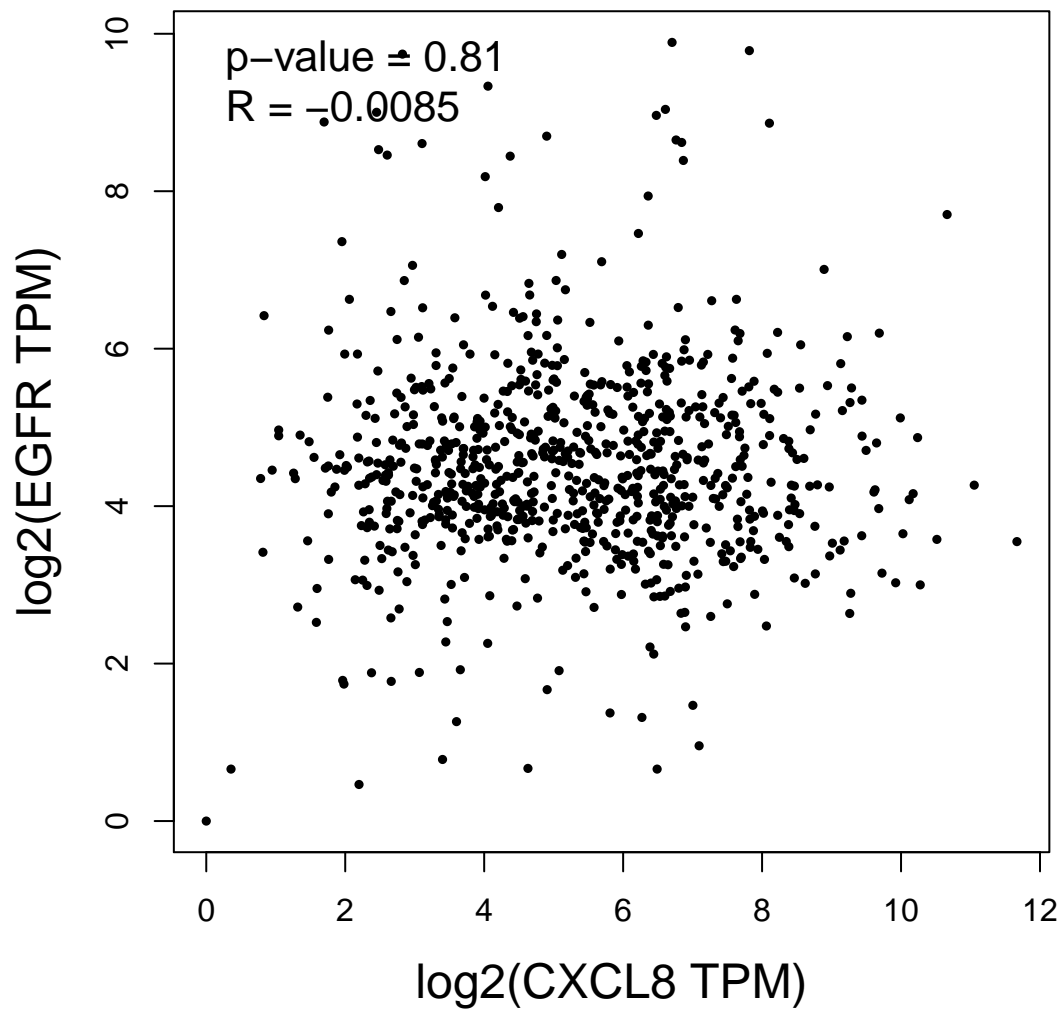

Supplement: f1 [file 6686158.f1.zip › Supplementary Figure 1C CXCL8_EGFR_correlation in LUSC.pdf]
